# Supplementary material for: The mixed effects of a package of multilevel interventions on the health and care of pregnant women in Zinder, Niger
Source: PubMed Central journal article supplement — BMJ Glob Health. 2019 Dec 10;4(6):e001200. doi: 10.1136/bmjgh-2018-001200 (PMC6936581; doi:10.1136/bmjgh-2018-001200), 2019-12-10
Supplement: bmjgh-2018-001200supp001.pdf [file bmjgh-2018-001200supp001.pdf]

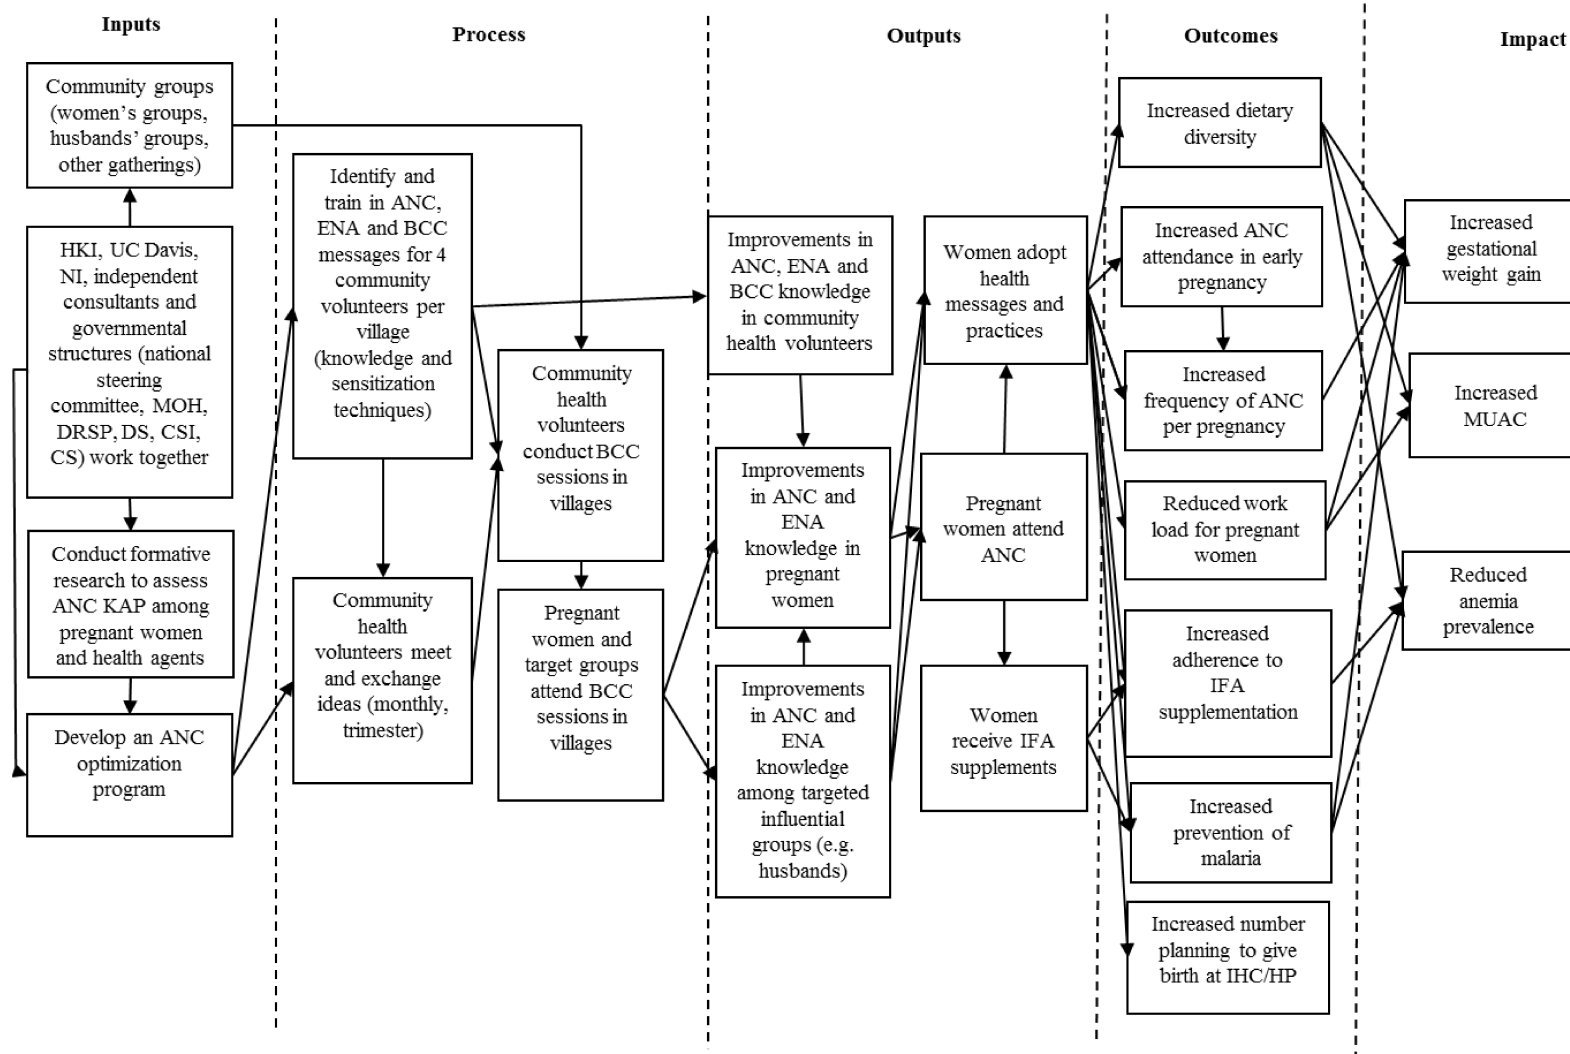

**Supplemental figure 1: Potential program impact pathway for behavior change communication activities**

Abbreviations: ANC: antenatal care; BCC: behavior change communication; DRSP: regional directorate of public health; DS: health district; ENA: essential nutrition actions; HKI: Helen Keller International; HP: health post; IFA: iron folic acid; IHC: integrated health center; KAP: knowledge attitude and practice; MOH: ministry of health; MUAC: mid-upper arm circumference; NI: Nutrition International; UC Davis: University of California, Davis
